# Supplementary material for: The purine receptor P2X7R regulates the release of pro-inflammatory cytokines in human craniopharyngioma
Source: PubMed Central journal article supplement (PMC5457505; doi:10.1530/erc-16-0338), 2017-04-07

**A**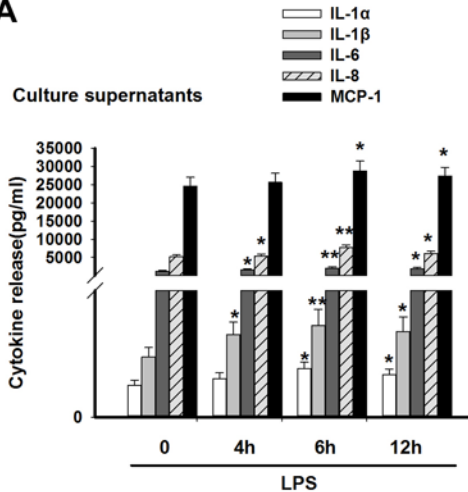**B**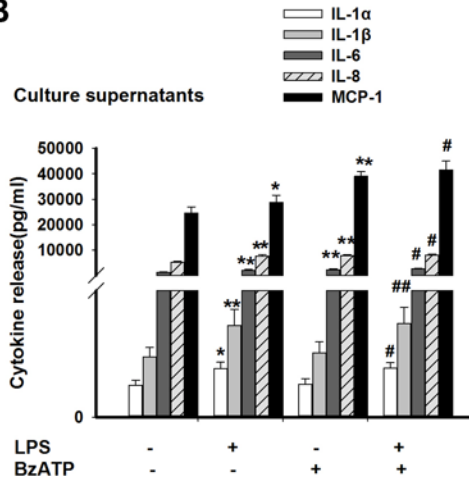

Supplement: erc-24-287-s002.pdf [file erc-24-287-s002.pdf]
